# Supplementary material
Source: Springer Nature journal article supplement (https://www.springermedizin.de/resource/supplementary/13054_2011_9730_MOESM1_ESM.pdf/9706838)
Supplement: MOESM1 [file 9706838]

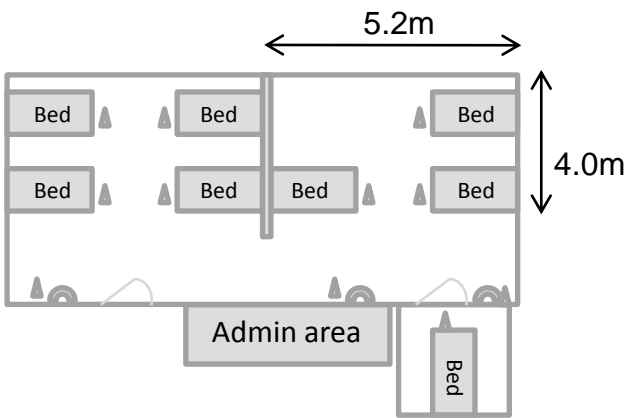

Pre Move ICU A. 8 physical spaces, 7 used. Possibility of 1 single patient room.

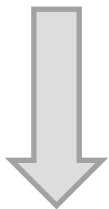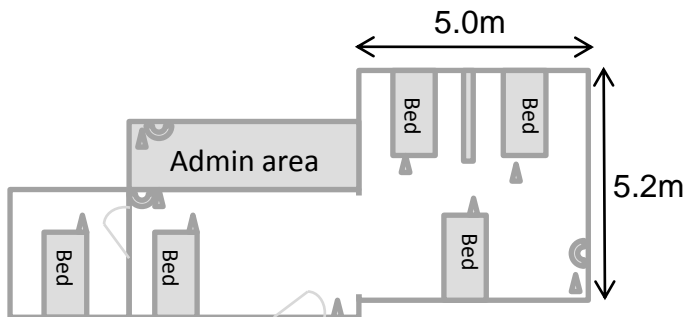

ICU B. Unchanged through study periods. 5 physical spaces, 4 used. Possibility of 1 single patient room.

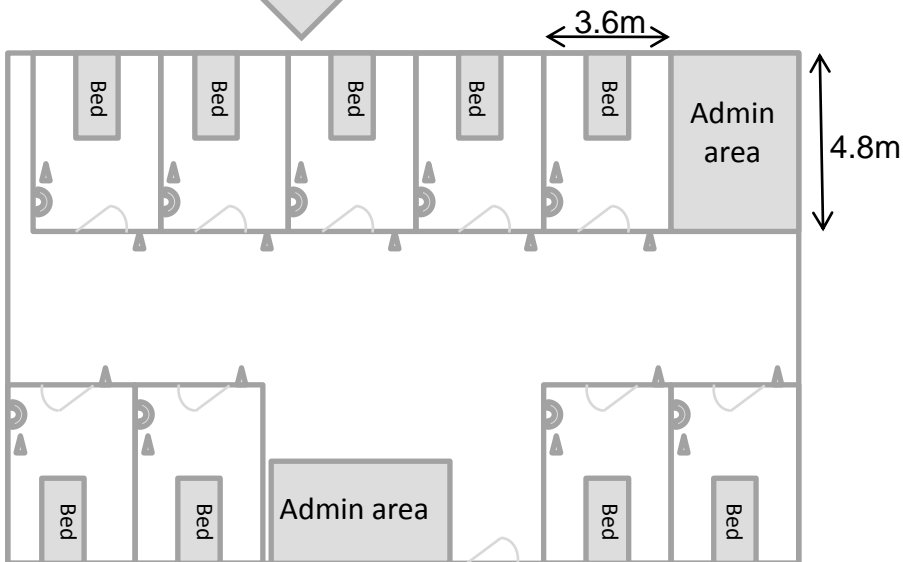

Post Move ICU A. 9 single patient physical spaces, 8 used.

 Alcohol Hand Rub Dispenser

 Sink
